# Supplementary material
Source: PubMed Central journal article supplement (PMC166995)
Supplement: plntphys_132_2_530__1.pdf [file plntphys_132_2_530__1.pdf]

## Supplement A: List of Arabidopsis kinases identified excluding RLK/Pelle family members known from previous analysis

Arabidopsis kinases are identified according to Materials and Methods. The sequences used were obtained from the July 4, 2001 release of the Arabidopsis Genome distributed by MAiDB. Domain information (as predicted using SMART and Pfam databases) other than the kinase domain is given for each gene.

The list is separated into two categories:

- I. Sequences with kinase domain but are either truncated or missing conserved residues.
- II. Sequences with alignable kinase domains.

### I. Truncated or "degenerate" Kinases not included in the phylogenetic analysis

Total: 31

|           |                       |
|-----------|-----------------------|
| At1g21650 | Ring finder, WD40     |
| At1g22720 | EGF                   |
| At1g22870 | -                     |
| At1g53090 | Coiled coil, WD40     |
| At1g53740 | -                     |
| At1g65950 | Signal                |
| At1g71810 | -                     |
| At1g79600 | -                     |
| At2g24990 | RIO kinase            |
| At2g31500 | EF hand               |
| At2g39190 | -                     |
| At2g40860 | Signal, PP2C domain   |
| At2g40980 | -                     |
| At2g43830 | -                     |
| AT3g51270 | Coiled coil           |
| AT3g57760 | -                     |
| AT3g63330 | -                     |
| AT3g63340 | PP2C catalytic domain |
| AT4g11110 | WD40 repeat           |
| AT4g16970 | -                     |
| AT4g31230 | -                     |
| AT4g31390 | -                     |
| AT5g05200 | -                     |
| AT5g18530 | WD40 repeat           |
| AT5g24970 | -                     |
| AT5g26110 | -                     |
| AT5g37350 | Coiled coil           |
| AT5g51800 | Transmembrane         |
| AT5g53450 | -                     |
| AT5g59630 | -                     |
| AT5g64940 | -                     |

### II. Kinases included in the phylogenetic tree in Supplementary Material B.

Total: 400

IRE1 homolog: 3 (306-308)

Newly identified RLK/Pelle family members: 23 (390-424)

| Tree Order | Gene Name | Motifs other than kinase |
|------------|-----------|--------------------------|
| 1          | At1g50700 | EF hand                  |
| 2          | At3g20410 | EF hand                  |
| 3          | At1g61950 | EF hand                  |
| 4          | At4g04720 | EF hand                  |
| 5          | At4g21940 | EF hand                  |
| 6          | At4g04740 | EF hand                  |
| 7          | At1g76040 | EF hand                  |
| 8          | At5g12180 | EF hand                  |
| 9          | At5g19360 | EF hand                  |
| 10         | At4g23650 | EF hand                  |
| 11         | At2g17290 | EF hand                  |
| 12         | At4g35310 | EF hand                  |
| 13         | At4g38230 | EF hand                  |
| 14         | At3g10660 | EF hand                  |
| 15         | At5g04870 | EF hand                  |
| 16         | At2g38910 | EF hand                  |
| 17         | At2g35890 | EF hand                  |
| 18         | At1g35670 | EF hand                  |
| 19         | At4g09570 | EF hand                  |
| 20         | At5g23580 | EF hand                  |
| 21         | At5g19450 | EF hand                  |
| 22         | At2g41860 | EF hand                  |
| 23         | At3g57530 | EF hand                  |
| 24         | At3g51850 | EF hand                  |
| 25         | At1g18890 | EF hand                  |
| 26         | At1g74740 | EF hand                  |
| 27         | At3g50530 | -                        |
| 28         | At1g49580 | -                        |
| 29         | At3g19100 | Coiled coil              |
| 30         | At2g41140 | -                        |
| 31         | At3g56760 | -                        |
| 32         | At3g49370 | -                        |
| 33         | At5g24430 | -                        |
| 34         | At2g46700 | -                        |
| 35         | At2g17890 | EF hand                  |
| 36         | At4g36070 | EF hand                  |
| 37         | At5g66210 | EF hand                  |
| 38         | At4g04700 | -                        |
| 39         | At4g04710 | EF hand                  |
| 40         | At1g12580 | -                        |
| 41         | At1g12680 | -                        |
| 42         | At1g08650 | -                        |
| 43         | At3g04530 | -                        |
| 45         | At5g07070 | -                        |
| 46         | At5g58380 | -                        |
| 47         | At5g01810 | -                        |
| 48         | At5g45820 | -                        |
| 49         | At4g30960 | -                        |
| 50         | At1g29230 | -                        |
| 51         | At2g34180 | -                        |
| 52         | At4g18700 | -                        |
| 53         | At5g45810 | -                        |
| 54         | At5g25110 | -                        |
| 55         | At5g10930 | -                        |
| 56         | At2g25090 | -                        |
| 57         | At2g30360 | -                        |
| 58         | At5g01820 | -                        |
| 59         | At2g38490 | -                        |
| 60         | At3g23000 | -                        |
| 61         | At4g14580 | -                        |
| 62         | At1g30270 | -                        |
| 63         | At1g01140 | -                        |
| 64         | At2g26980 | -                        |
| 65         | At4g24400 | -                        |
| 66         | At5g35410 | -                        |

|     |           |                               |     |           |             |
|-----|-----------|-------------------------------|-----|-----------|-------------|
| 67  | At3g17510 | -                             | 137 | At3g12200 | -           |
| 68  | At1g48260 | -                             | 138 | At3g63280 | -           |
| 69  | At5g57630 | -                             | 139 | At1g50230 | -           |
| 70  | At3g01090 | Ubiquitin associated domain   | 140 | At5g18700 | -           |
| 71  | At3g29160 | Ubiquitin associated domain   | 141 | At5g20930 | Coiled coil |
| 72  | At5g39440 | Ubiquitin associated domain   | 143 | At1g77720 | -           |
| 73  | At3g50500 | -                             | 144 | At1g53050 | -           |
| 74  | At5g66880 | -                             | 145 | At5g50860 | -           |
| 75  | At4g33950 | -                             | 146 | At1g54610 | -           |
| 76  | At1g78290 | -                             | 147 | At3g05050 | -           |
| 77  | At1g10940 | Coiled coil                   | 148 | At1g03740 | -           |
| 78  | At1g60940 | Coiled coil                   | 149 | At5g44290 | -           |
| 79  | At5g08590 | Coiled coil                   | 150 | At4g22940 | -           |
| 80  | At5g63650 | Coiled coil                   | 151 | At1g09600 | -           |
| 81  | At2g23030 | -                             | 152 | At1g57700 | -           |
| 82  | At4g40010 | -                             | 153 | At1g33770 | -           |
| 83  | At5g47750 | -                             | 154 | At4g10010 | -           |
| 84  | At4g26610 | -                             | 155 | At1g74330 | -           |
| 85  | At5g55910 | -                             | 156 | At1g18670 | -           |
| 86  | At3g27580 | -                             | 157 | At5g39420 | -           |
| 87  | At1g79250 | -                             | 158 | At5g10270 | -           |
| 88  | At1g16440 | -                             | 159 | At5g64960 | -           |
| 89  | At3g12690 | -                             | 160 | At1g67580 | -           |
| 90  | At5g40030 | -                             | 161 | At5g63370 | -           |
| 91  | At2g44830 | -                             | 162 | At1g20930 | -           |
| 92  | At2g36350 | -                             | 163 | At1g76540 | -           |
| 93  | At3g52890 | -                             | 164 | At2g38620 | -           |
| 94  | At5g03640 | -                             | 165 | At3g54180 | -           |
| 95  | At2g34650 | -                             | 166 | At3g48750 | -           |
| 96  | At2g26700 | Zinc finger                   | 168 | At1g18040 | -           |
| 97  | At3g44610 | Signal                        | 169 | At1g73690 | -           |
| 98  | At1g53700 | -                             | 170 | At1g66750 | -           |
| 99  | At3g14370 | -                             | 171 | At5g63610 | -           |
| 100 | At3g45780 | PAS, PAC                      | 172 | At4g01370 | -           |
| 101 | At5g58140 | PAS, PAC                      | 173 | At1g01560 | -           |
| 102 | At1g51170 | -                             | 174 | At2g46070 | -           |
| 103 | At3g20830 | -                             | 175 | At1g07880 | -           |
| 104 | At3g25250 | -                             | 176 | At4g11330 | -           |
| 105 | At4g13000 | -                             | 177 | At2g43790 | -           |
| 106 | At1g03920 | Coiled coil, Kinase extension | 178 | At3g59790 | -           |
| 107 | At2g20470 | Coiled coil, Kinase extension | 179 | At3g45640 | -           |
| 108 | At3g23310 | Coiled coil, Kinase extension | 180 | At1g10210 | -           |
| 109 | At4g14350 | Kinase extension              | 181 | At1g59580 | -           |
| 110 | At4g33080 | Kinase extension              | 182 | At2g18170 | -           |
| 111 | At2g19400 | Kinase extension              | 183 | At4g36450 | -           |
| 112 | At1g30640 | Coiled coil, Kinase extension | 184 | At1g18150 | -           |
| 113 | At5g09890 | Kinase extension              | 185 | At1g73670 | -           |
| 114 | At2g20040 | -                             | 186 | At3g18040 | Coiled coil |
| 115 | At1g48490 | Kinase extension              | 187 | At5g19010 | -           |
| 116 | At3g17850 | Kinase extension              | 188 | At2g42880 | -           |
| 117 | At5g62310 | Kinase extension              | 189 | At1g53510 | -           |
| 118 | At1g45160 | Kinase extension              | 190 | At3g14720 | -           |
| 119 | At3g08730 | Kinase extension              | 191 | At2g01450 | -           |
| 120 | At3g08720 | Kinase extension              | 193 | At4g19110 | -           |
| 121 | At3g10540 | -                             | 194 | At5g45430 | -           |
| 122 | At5g04510 | -                             | 195 | At4g13020 | -           |
| 123 | At2g25880 | -                             | 196 | At4g28980 | -           |
| 124 | At4g32830 | -                             | 197 | At3g05840 | -           |
| 125 | At2g45490 | -                             | 198 | At5g26751 | -           |
| 126 | At5g60550 | -                             | 199 | At5g14640 | -           |
| 127 | At3g45240 | -                             | 200 | At4g00720 | -           |
| 128 | At2g37840 | -                             | 201 | At1g57870 | -           |
| 129 | At3g53930 | -                             | 202 | At1g09840 | -           |
| 130 | At3g61960 | -                             | 203 | At3g61160 | -           |
| 131 | At1g49180 | -                             | 204 | At2g30980 | -           |
| 132 | At3g04810 | -                             | 205 | At1g06390 | -           |
| 133 | At5g28290 | -                             | 206 | At4g18710 | -           |
| 134 | At1g54510 | -                             | 208 | At3g50000 | -           |
| 135 | At3g44200 | -                             | 209 | At5g67380 | -           |
| 136 | At3g20860 | -                             | 211 | At2g23080 | -           |

|     |           |                                    |         |           |                             |
|-----|-----------|------------------------------------|---------|-----------|-----------------------------|
| 212 | At2g23070 | Signal                             | 286     | At5g12090 | -                           |
| 214 | At3g53570 | -                                  | 287     | At2g42550 | -                           |
| 215 | At4g32660 | -                                  | 288     | At2g41930 | -                           |
| 216 | At4g24740 | -                                  | 289     | At2g40560 | -                           |
| 218 | At1g73460 | -                                  | 290     | At2g40500 | -                           |
| 219 | At1g73450 | -                                  | 291     | At2g40580 | -                           |
| 220 | At3g17750 | -                                  | 292     | At3g56280 | -                           |
| 221 | At2g40120 | -                                  | 293     | At3g04910 | -                           |
| 222 | At5g35980 | -                                  | 294     | At5g28080 | -                           |
| 223 | At1g13350 | Coiled coil                        | 295     | At3g22420 | -                           |
| 224 | At3g53640 | Coiled coil                        | 296     | At3g48260 | Coiled coil                 |
| 225 | At3g25840 | Coiled coil                        | 297     | At3g51630 | -                           |
| 226 | At3g44850 | -                                  | 298     | At5g58350 | -                           |
| 227 | At5g22840 | -                                  | 299     | At3g18750 | Coiled coil                 |
| 228 | At3g53030 | -                                  | 300     | At1g49160 | Coiled coil                 |
| 229 | At4g35500 | -                                  | 301     | At5g41990 | -                           |
| 230 | At2g17530 | -                                  | 302     | At1g64630 | Signal, Coiled coil         |
| 231 | At3g21220 | Signal                             | 303     | At5g55560 | -                           |
| 232 | At1g51660 | Signal                             | 304     | At1g02970 | -                           |
| 233 | At1g18350 | Signal                             | 305     | At3g59410 | -                           |
|     |           |                                    | 306     | At5g24360 | Signal, Transmembrane, IRE1 |
| 234 | At1g73500 | -                                  | homolog |           |                             |
| 235 | At3g06230 | -                                  | 307     | At2g17520 | IRE1 homolog                |
| 236 | At1g32320 | Signal                             | 308     | At3g11870 | Signal, IRE1 homolog        |
| 237 | At4g29810 | -                                  | 309     | At2g40730 | -                           |
| 238 | At4g26070 | -                                  | 310     | At4g29380 | WD40                        |
| 239 | At5g56580 | -                                  | 311     | At1g04210 | LRR                         |
| 240 | At5g40440 | Nuclear transport factor 2         | 312     | At5g08160 | -                           |
| 242 | At4g10730 | Coiled coil                        | 313     | At2g32850 | -                           |
| 243 | At4g24100 | -                                  | 314     | At4g32250 | -                           |
| 244 | At5g14720 | -                                  | 315     | At5g13530 | Ring finger, Ankyrin repeat |
| 245 | At1g79640 | -                                  | 316     | At1g73660 | -                           |
| 246 | At1g70430 | Coiled coil                        | 317     | At1g18160 | -                           |
| 247 | At1g23700 | -                                  | 318     | At1g08720 | -                           |
| 248 | At4g14480 | Coiled coil                        | 319     | At5g11850 | -                           |
| 249 | At1g69220 | -                                  | 320     | At5g03730 | -                           |
| 250 | At3g15220 | -                                  | 321     | At4g24480 | -                           |
| 251 | At4g08500 | -                                  | 322     | At4g23050 | PAS, PAC                    |
| 252 | At4g08480 | -                                  | 323     | At5g49470 | Coiled coil, PAS, PAC       |
| 253 | At4g08470 | -                                  | 324     | At1g67890 | Coiled coil, PAS, PAC       |
| 254 | At4g12020 | Signal, Transmembrane              | 325     | At3g06630 | Coiled coil, PAS, PAC       |
| 255 | At1g53570 | -                                  | 326     | At3g06620 | Coiled coil, PAS, PAC       |
| 256 | At1g63700 | -                                  | 327     | At3g06640 | PAS, PAC                    |
| 257 | At5g66850 | -                                  | 328     | At2g31010 | -                           |
| 258 | At3g07980 | Transmembrane                      | 329     | At3g58640 | -                           |
| 259 | At3g13530 | Armadillo/beta-catenin like repeat | 330     | At2g42630 | -                           |
| 261 | At1g09000 | -                                  | 331     | At1g16270 | -                           |
| 262 | At1g54960 | -                                  | 332     | At1g79570 | -                           |
| 263 | At3g06030 | -                                  | 333     | At2g35050 | -                           |
| 264 | At2g43930 | -                                  | 334     | At1g04700 | -                           |
| 266 | At4g26890 | -                                  | 335     | At3g24720 | -                           |
| 267 | At5g55090 | -                                  | 336     | At3g46920 | -                           |
| 268 | At2g32510 | -                                  | 337     | At5g57610 | Signal                      |
| 269 | At1g05100 | -                                  | 338     | At3g01490 | -                           |
| 270 | At3g50310 | -                                  | 339     | At5g50000 | Coiled coil                 |
| 271 | At5g67080 | -                                  | 340     | At3g22750 | -                           |
| 272 | At4g36950 | PLC catalytic domain X             | 341     | At4g14780 | -                           |
| 273 | At1g07150 | -                                  | 342     | At3g63260 | -                           |
| 274 | At2g30040 | -                                  | 343     | At2g24360 | -                           |
| 275 | At3g46140 | -                                  | 344     | At4g31170 | -                           |
| 276 | At3g45790 | -                                  | 345     | At1g62400 | -                           |
| 277 | At3g45670 | -                                  | 346     | At3g46930 | -                           |
| 278 | At3g46160 | Coiled coil                        | 347     | At5g58950 | -                           |
| 279 | At2g18530 | -                                  | 348     | At2g17700 | Pfam ACT domain             |
| 280 | At2g34290 | -                                  | 349     | At4g35780 | -                           |
| 281 | At5g27790 | -                                  | 350     | At4g38470 | Pfam ACT domain             |
| 282 | At2g41920 | -                                  | 351     | At3g27560 | -                           |
| 283 | At2g05060 | -                                  | 352     | At5g40540 | -                           |
| 284 | At2g41910 | Transmembrane                      | 353     | At5g50180 | -                           |
| 285 | At5g27510 | -                                  | 354     | At5g01850 | -                           |

|     |           |                         |
|-----|-----------|-------------------------|
| 355 | At3g50720 | -                       |
| 356 | At3g50730 | -                       |
| 357 | At5g66710 | -                       |
| 358 | At5g07140 | -                       |
| 359 | At5g58520 | -                       |
| 361 | At4g18950 | Ankyrin repeat          |
| 362 | At3g58760 | Ankyrin repeat          |
| 363 | At1g14000 | Ankyrin repeat          |
| 364 | At3g59830 | Ankyrin repeat          |
| 365 | At2g43850 | Ankyrin repeat          |
| 366 | At2g31800 | Ankyrin repeat          |
| 367 | At1g64300 | Coiled coil             |
| 368 | At5g41730 | Signal                  |
| 369 | At1g01450 | -                       |
| 390 | At2g11530 | RLK/Pelle family member |
| 391 | At3g45920 | RLK/Pelle family member |
| 392 | At1g22720 | RLK/Pelle family member |
| 398 | At2g30730 | RLK/Pelle family member |
| 399 | At3g08760 | RLK/Pelle family member |
| 407 | At1g01740 | RLCK XII                |
| 408 | At4g00710 | RLCK XII                |
| 409 | At5g41260 | RLCK XII                |
| 410 | At3g54030 | RLCK XII                |
| 411 | At3g09240 | RLCK XII                |
| 412 | At1g63500 | RLCK XII                |
| 413 | At5g46570 | RLCK XII                |
| 414 | At1g50990 | RLCK XII                |
| 415 | At2g17170 | RLCK XII                |
| 416 | At3g57750 | RLCK XII                |
| 417 | At3g52530 | RLCK XII                |
| 418 | At3g57700 | RLCK XII                |
| 419 | At3g57730 | RLCK XII                |
| 420 | At3g57740 | RLCK XII                |
| 421 | At3g57640 | RLCK XII                |
| 422 | At1g65190 | RLCK XII                |
| 423 | At2g40270 | RLCK XII                |
| 424 | At3g57120 | RLCK XII                |
| 425 | At1g68830 | Transmembrane           |
| 426 | At5g01920 | -                       |
| 427 | At2g40870 | -                       |
| 429 | At4g14340 | -                       |
| 430 | At3g23340 | -                       |
| 431 | At1g04440 | -                       |
| 432 | At5g43320 | -                       |
| 433 | At1g03930 | -                       |
| 434 | At5g44100 | -                       |
| 435 | At4g28540 | -                       |
| 436 | At4g26100 | -                       |
| 437 | At1g72710 | -                       |
| 438 | At2g19470 | -                       |
| 439 | At4g08800 | -                       |
| 440 | At4g28860 | -                       |
| 441 | At4g28880 | -                       |
| 443 | At2g25760 | -                       |
| 444 | At3g13670 | -                       |
| 445 | At3g03940 | Transmembrane           |
| 446 | At5g18190 | -                       |
