# Supplementary material
Source: PubMed Central journal article supplement (PMC166995)

**Supplement B: Bootstrapped Neighbor-Joining Tree of Arabidopsis Kinases**

Shiu, S.-H. and Bleecker, A. B. 2003

This bootstrapped tree was generated based on the kinase domain alignments of the following sequences: (A), "All" *Arabidopsis* kinases (for the RLK/Pelle family, only 11 representatives were included), (B). Representative kinase family members from *Arabidopsis* and human for the purpose of classification, and (C). The outgroup sequence APH(3')3. The values at the base of the branches are the bootstrap value of 100 replicates.

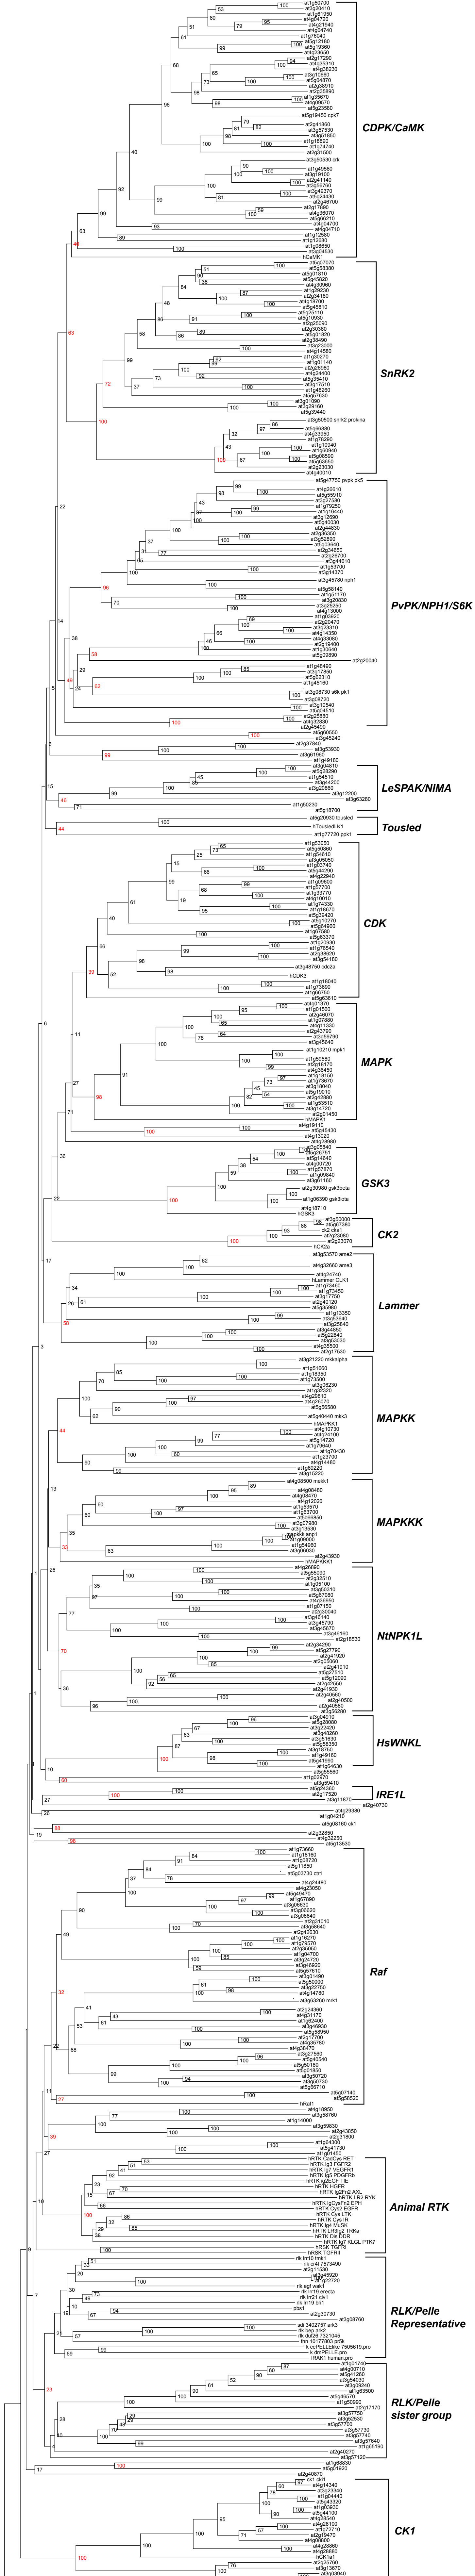

Supplement: plntphys_132_2_530__2.pdf [file plntphys_132_2_530__2.pdf]
