# Supplementary material
Source: PubMed Central journal article supplement (PMC166995)

# Supplement C. Domain organization and intron placement of Arabidopsis RLK/Pelle family members

Shi, S., et al., and A. D. Blecker, 2003  
Sequencing and gene models were according to the July 4, 2001 release of the Arabidopsis genome from MAJDB and updated according to the Nov. 12, 2002 release. The domain organization predictions were obtained from SMART and/or Pfam databases. The order of RLK/Pelle family members is the same as that of the Neighbor-Joining tree published previously (Shi and Blecker, 2001b).

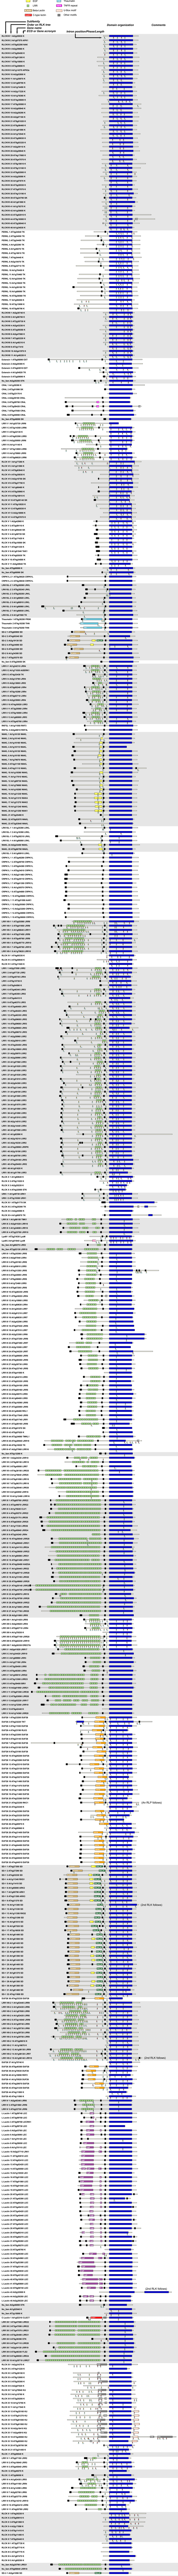

Supplement: plntphys_132_2_530__3.pdf [file plntphys_132_2_530__3.pdf]
