# Supplementary material
Source: PubMed Central journal article supplement (PMC166995)
Supplement: plntphys_132_2_530__4.pdf [file plntphys_132_2_530__4.pdf]

**Supplement D. Correspondence between duplicated regions**

| Chr        | A          | B          |          |           |            |         |
|------------|------------|------------|----------|-----------|------------|---------|
| REgion ID1 | Gene Name2 | Subfamily3 | Cluster4 | Gene Name | Subfamily  | Cluster |
| 1-1 A      | Atlg09970  | LRR XI     |          |           |            |         |
| 1-1 A      | Atlg10620  | PERKL      |          |           |            |         |
| 1-1 A      | Atlg10860  | LRR III    |          | Atlg60630 | LRR III    |         |
| 1-1 A      | Atlg11050  | RKF3L      |          | Atlg60800 | LRR II     |         |
| 1-1 A      | Atlg11140  | LRR V      |          |           |            |         |
| 1-1 A      | Atlg11280  | SD-1       | 1b       | Atlg61360 | SD-1       | lj      |
| 1-1 A      | Atlg11300  | SD-1       | 1b       | Atlg61370 | SD-1       | lj      |
| 1-1 A      | Atlg11310  | SD-1       | 1b       | Atlg61380 | SD-1       | lj      |
| 1-1 A      | Atlg11330  | SD-1       | 1b       | Atlg61390 | SD-1       | lj      |
| 1-1 A      | Atlg11340  | SD-1       | 1b       | Atlg61400 | SD-1       | lj      |
| 1-1 A      | Atlg11350  | SD-1       | 1b       | Atlg61420 | SD-1       | lj      |
| 1-1 A      | Atlg11410  | SD-1       | 1b       | Atlg61430 | SD-1       | lj      |
| 1-1 A      |            |            |          | Atlg61440 | SD-1       | lj      |
| 1-1 A      |            |            |          | Atlg61460 | SD-1       | lj      |
| 1-1 A      |            |            |          | Atlg61480 | SD-1       | lj      |
| 1-1 A      |            |            |          | Atlg61490 | SD-1       | lj      |
| 1-1 A      |            |            |          | Atlg61500 | SD-1       | lj      |
| 1-1 A      |            |            |          | Atlg61550 | SD-1       | lj      |
| 1-1 A      |            |            |          | Atlg61590 | RLCKVII    |         |
| 1-1 A      |            |            |          | Atlg61610 | SD-1       | lj      |
| 1-1 A      |            |            |          | Atlg61860 | RLCKVII    |         |
| 1-1 A      |            |            |          | Atlg62090 | LRR I      |         |
| 1-1 A      | Atlg12460  | LRR VII    |          | Atlg62950 | LRR VII    |         |
| 1-1 B      |            |            |          | Atlg80870 | N.A.       |         |
| 1-1 B      |            |            |          | Atlg80640 | N.A.       |         |
| 1-1 B      | Atlg15530  | L-Lectin   |          |           |            |         |
| 1-1 B      | Atlg16110  | WAKL       | 1c       | Atlg79680 | WAKL       | 1r      |
| 1-1 B      | Atlg16120  | WAKL       | 1c       | Atlg79670 | WAKL       | 1r      |
| 1-1 B      | Atlg16130  | WAKL       | 1c       |           |            |         |
| 1-1 B      | Atlg16140  | WAKL       | 1c       |           |            |         |
| 1-1 B      | Atlg16150  | WAKL       | 1c       |           |            |         |
| 1-1 B      | Atlg16160  | WAKL       | 1c       |           |            |         |
| 1-1 B      | Atlg16260  | WAKL       | 1c'      |           |            |         |
| 1-1 B      | Atlg16670  | LRR VIII-2 |          |           |            |         |
| 1-1 B      |            |            |          | Atlg79620 | LRR VIII-1 |         |
| 1-1 B      |            |            |          | Atlg78980 | LRR V      |         |
| 1-1 B      | Atlg16760  | RLCK IX    |          | Atlg78940 | RLCK IX    |         |
| 1-1 B      |            |            |          | Atlg78530 | LRR X      |         |
| 1-1 C      |            |            |          | Atlg72460 | LRR III    |         |
| 1-1 C      |            |            |          | Atlg72540 | RLCKVII    |         |
| 1-1 C      | Atlg17540  | RLCK IX    |          | Atlg72760 | RLCK IX    |         |
| 1-1 C      | Atlg17750  | LRR XI     |          | Atlg73080 | LRR XI     |         |
| 1-1 C      | Atlg17910  | WAKL       |          |           |            |         |
| 1-1 C      | Atlg18390  | LRR10L-1   |          |           |            |         |
| 1-1 C      | Atlg19090  | DUF26      |          |           |            |         |
| 1-1 C      | Atlg19390  | WAKL       |          |           |            |         |
| 1-1 C      |            |            |          | Atlg74360 | LRR X      |         |
| 1-1 C      |            |            |          | Atlg74490 | RLCKVII    |         |
| 1-1 C      |            |            |          | Atlg75640 | LRR VII    |         |
| 1-1 C      |            |            |          | Atlg75820 | LRR XI     |         |
| 1-1 C      |            |            |          | Atlg76360 | RLCKVII    | 1q      |
| 1-1 C      | Atlg20650  | RLCKVII    |          | Atlg76370 | RLCKVII    | 1q      |
| 1-1 C      | Atlg21210  | WAKL       | 1d       |           |            |         |
| 1-1 C      | Atlg21230  | WAKL       | 1d       |           |            |         |
| 1-1 C      | Atlg21240  | WAKL       | 1d       |           |            |         |
| 1-1 C      | Atlg21240a | WAKL       | 1d       |           |            |         |
| 1-1 C      | Atlg21250  | WAKL       | 1d       |           |            |         |
| 1-1 C      | Atlg21270  | WAKL       | 1d       |           |            |         |
| 1-1 C      | Atlg21590  | RLCK VI    |          | Atlg77280 | RLCK VI    |         |
| 1-1 D      |            |            |          | Atlg70740 | DUF26      | 1p'     |
| 1-1 D      |            |            |          | Atlg70530 | DUF26      | 1p      |
| 1-1 D      |            |            |          | Atlg70520 | DUF26      | 1p      |
| 1-1 D      | Atlg23540  | PERKL      |          | Atlg70460 | PERKL      | 1o      |
| 1-1 D      |            |            |          | Atlg70450 | PERKL      | 1o      |
| 1-1 D      |            |            |          | Atlg70250 | Thaumatin  |         |
| 1-1 D      |            |            |          | Atlg70130 | L-Lectin   | 1n      |
| 1-1 D      |            |            |          | Atlg70110 | L-Lectin   | 1n      |
| 1-1 D      | Atlg24030  | RLCKVII    |          |           |            |         |
| 1-1 E      | Atlg24650  | LRR IX     |          |           |            |         |
| 1-1 E      | Atlg25320  | LRR VII    |          | Atlg67510 | LRR VII    |         |
| 1-1 E      | Atlg25390  | LRR10L-1   |          | Atlg67520 | SD-1       |         |
| 1-1 E      |            |            |          | Atlg67720 | LRR I      |         |
| 1-1 E      |            |            |          | Atlg68400 | LRR III    |         |

| Chr        | A          | B          |          |            |            |         |
|------------|------------|------------|----------|------------|------------|---------|
| REgion ID1 | Gene Name2 | Subfamily3 | Cluster4 | Gene Name  | Subfamily  | Cluster |
| 1-1 E      | Atlg26150  | PERKL      |          | Atlg68690  | PERKL      |         |
| 1-1 E      |            |            |          | Atlg69270  | LRR X      |         |
| 1-1 E      |            |            |          | Atlg69730  | WAKL       |         |
| 1-1 E      | Atlg26970  | RLCKVII    |          | Atlg69790  | RLCKVII    |         |
| 1-1 E      |            |            |          | Atlg69910  | LRR10L-1   |         |
| 1-1 E      | Atlg27190  | LRR X      |          | Atlg69990  | LRR X      |         |
| 1-2 A      | Atlg05700  | LRR I      |          |            |            |         |
| 1-2 A      |            |            |          | At2g33170  | LRR XI     |         |
| 1-2 A      |            |            |          | At2g32800a |            | 2g      |
| 1-2 A      |            |            |          | At2g32800  | L-Lectin   | 2g      |
| 1-2 A      |            |            |          | At2g31880  | LRR X      |         |
| 1-2 A      |            |            |          | At2g30940  | RLCK V     |         |
| 1-2 A      | Atlg06700  | RLCKVIII   |          | At2g30740  | RLCKVIII   | 2f      |
| 1-2 A      |            |            |          | At2g30730  | RLCKVIII   | 2f      |
| 1-2 A      | Atlg06840  | LRR VIII-1 |          |            |            |         |
| 1-2 A      |            |            |          | At2g29250  | L-Lectin   | 2e      |
| 1-2 A      |            |            |          | At2g29220  | L-Lectin   | 2e      |
| 1-2 A      | Atlg07550  | LRR I      | 1a       | At2g29010  | LRR I      | 2d      |
| 1-2 A      | Atlg07560  | LRR I      | 1a       | At2g28990  | LRR I      | 2d      |
| 1-2 A      |            |            |          | At2g28970  | LRR I      | 2d      |
| 1-2 A      |            |            |          | At2g28960  | LRR I      | 2d      |
| 1-2 A      | Atlg07570  | RLCKVII    |          | At2g28940  | RLCKVII    | 2c      |
| 1-2 A      |            |            |          | At2g28930  | RLCKVII    | 2c      |
| 1-2 A      | Atlg07650  | LRR VIII-2 |          |            |            |         |
| 1-2 A      | Atlg07870  | RLCKVII    |          | At2g28590  | RLCKVII    |         |
| 1-2 A      |            |            |          | At2g28250  |            |         |
| 1-2 B      | Atlg14370  | RLCKVII    |          | At2g02800  | RLCKVII    |         |
| 1-2 B      | Atlg14390  | LRR VI     |          | At2g02780  | LRR VI     |         |
| 1-2 B      |            |            |          | At2g02220  | LRR X      |         |
| 1-2 B      |            |            |          | At2g01950  | LRR X      |         |
| 1-2 B      |            |            |          | At2g01820  | LRR IX     |         |
| 1-2 B      |            |            |          | At2g01210  | LRR VII    |         |
| 1-2 C      | Atlg29720  | LRR VIII-2 | 1e       |            |            |         |
| 1-2 C      | Atlg29730  | LRR VIII-2 | 1e       |            |            |         |
| 1-2 C      | Atlg29740  | LRR VIII-2 | 1e       |            |            |         |
| 1-2 C      | Atlg29750  | LRR VIII-2 | 1e       |            |            |         |
| 1-2 C      | Atlg30570  | CRPK1L 1   |          |            |            |         |
| 1-2 C      | Atlg31420  | LRR X      |          |            |            |         |
| 1-3 A      | Atlg48210  | RLCKVIII   | 1f       | AT3g17410  | RLCKVIII   |         |
| 1-3 A      | Atlg48220  | RLCKVIII   | 1f       |            |            |         |
| 1-3 A      |            |            |          | AT3g17420  | RLCK V     |         |
| 1-3 A      | Atlg48480  | LRR III    |          | AT3g17840  | LRR III    |         |
| 1-3 A      | Atlg49100  | LRR I      |          |            |            |         |
| 1-3 A      | Atlg49270  | PERKL      |          | AT3g18810  | PERKL      |         |
| 1-3 A      | Atlg49730  | URK I      |          | AT3g19300  | URK I      |         |
| 1-3 A      |            |            |          | AT3g19700  | LRR XI     |         |
| 1-3 A      | Atlg50610  | LRR III    |          | AT3g20190  | LRR III    |         |
| 1-3 A      |            |            |          | AT3g20200  | RLCK IX    |         |
| 1-3 A      |            |            |          | AT3g20530  | RLCKVII    |         |
| 1-3 A      | Atlg51620  | N.A.       |          |            |            |         |
| 1-3 A      | Atlg51790  | LRR I      | 1g       | AT3g21340  | LRR I      |         |
| 1-3 A      | Atlg51790a | LRR I      | 1g       |            |            |         |
| 1-3 A      | Atlg51800  | LRR I      | 1g       |            |            |         |
| 1-3 A      | Atlg51810  | LRR I      | 1g       |            |            |         |
| 1-3 A      | Atlg51820  | LRR I      | 1g       |            |            |         |
| 1-3 A      | Atlg51830  | LRR I      | 1g       |            |            |         |
| 1-3 A      | Atlg51850  | LRR I      | 1g       |            |            |         |
| 1-3 A      | Atlg51860  | LRR I      | 1g       |            |            |         |
| 1-3 A      | Atlg51870  | LRR I      | 1g       |            |            |         |
| 1-3 A      | Atlg51880  | LRR I      | 1g       |            |            |         |
| 1-3 A      | Atlg51890  | LRR I      | 1g       |            |            |         |
| 1-3 A      | Atlg51910  | LRR I      | 1g       |            |            |         |
| 1-3 B      | Atlg52290  | PERKL      |          |            |            |         |
| 1-3 B      |            |            |          | AT3g16030  | SD-1       |         |
| 1-3 B      | Atlg52310  | C-Lectin   |          |            |            |         |
| 1-3 B      | Atlg52540  | N.A.       |          | AT3g15890  | N.A.       |         |
| 1-3 B      | Atlg53420  | LRR VIII-2 | 1h       | AT3g14840  | LRR VIII-2 |         |
| 1-3 B      | Atlg53430  | LRR VIII-2 | 1h       |            |            |         |
| 1-3 B      | Atlg53440  | LRR VIII-2 | 1h       |            |            |         |
| 1-3 B      | Atlg53730  | LRR V      |          | AT3g14350  | LRR V      |         |
| 1-3 B      | Atlg54820  | Extensin   |          |            |            |         |
| 1-3 B      | Atlg55200  | PERKL      |          | AT3g13690  | PERKL      |         |
| 1-3 B      | Atlg55610  | LRR X      |          | AT3g13380  | LRR X      |         |

**Supplement D. Correspondence between duplicated regions (Contd.)**

| Chr        | A          | B          |          | Gene Name | Subfamily     | Cluster | Chr        | A          | B          |          | Gene Name | Subfamily  | Cluster |
|------------|------------|------------|----------|-----------|---------------|---------|------------|------------|------------|----------|-----------|------------|---------|
| REgion ID1 | Gene Name2 | Subfamily3 | Cluster4 |           |               |         | REgion ID1 | Gene Name2 | Subfamily3 | Cluster4 |           |            |         |
| 1-3 B      | At1g56120  | LRR VIII-2 | li       |           |               |         | 2-4 B      |            |            |          | AT4g29050 | L-Lectin   |         |
| 1-3 B      | At1g56130  | LRR VIII-2 | li       |           |               |         | 2-4 B      |            |            |          | AT4g28670 | DUF26      |         |
| 1-3 B      | At1g56140  | LRR VIII-2 | li       |           |               |         | 2-4 B      |            |            |          | AT4g28650 | LRR XI     |         |
| 1-3 B      | At1g56140a | LRR VIII-2 | li       |           |               |         | 2-4 B      |            |            |          | AT4g28490 | LRR XI     |         |
| 1-3 B      |            |            |          | AT3g13065 | LRR V         |         | 2-4 B      |            |            |          | AT4g28350 | L-Lectin   |         |
| 1-4 A      |            |            |          | AT4g00330 | RLCK IV       |         | 2-4 B      | At2g19410  | RLCK IX    |          |           |            |         |
| 1-4 A      |            |            |          | AT4g00340 | SD-2          |         | 2-4 B      | At2g20300  | Extensin   |          |           |            |         |
| 1-4 A      |            |            |          | AT4g00960 | DUF26         | 4a      | 2-4 C      |            |            |          | AT4g38830 | DUF26      |         |
| 1-4 A      |            |            |          | AT4g00970 | DUF26         | 4a      | 2-4 C      | At2g21480  | CRPK1L 1   |          | AT4g39110 | CRPK1L 1   |         |
| 1-4 A      | At1g01540  | RLCK V     |          | AT4g01330 | RLCK V        |         | 2-4 C      |            |            |          | AT4g39270 | LRR IV     |         |
| 1-4 A      |            |            |          | AT4g02010 | Extensin      |         | 2-4 C      |            |            |          | AT4g39400 | LRR X      |         |
| 1-4 A      |            |            |          | AT4g02410 | L-Lectin      | 4b      | 2-4 D      | At2g23200  | CRPK1L 1   |          |           |            |         |
| 1-4 A      |            |            |          | AT4g02420 | L-Lectin      | 4b      | 2-4 D      | At2g23300  | LRR VII    |          | AT4g37250 | LRR VII    |         |
| 1-4 A      |            |            |          | AT4g02630 | RLCK V        |         | 2-4 D      | At2g23450  | WAKL       |          |           |            |         |
| 1-4 A      |            |            |          | AT4g03230 | SD-1          |         | 2-4 E      | At2g23950  | LRR II     |          | AT4g30520 | LRR II     |         |
| 1-4 A      |            |            |          | AT4g03390 | LRR V         |         | 2-4 E      |            |            |          | AT4g31100 | WAKL       | 4i      |
| 1-5 A      | At1g63430  | LRR VI     |          | AT5g41180 | LRR VI        |         | 2-4 E      |            |            |          | AT4g31110 | WAKL       | 4i      |
| 1-5 A      | At1g64210  | LRR III    |          | AT5g41680 | LRR III       |         | 2-4 E      | At2g24130  | LRR XII    |          |           |            |         |
| 1-5 A      |            |            |          | AT5g37450 | LRR VIII-1    |         | 2-4 E      |            |            |          | AT4g31220 | RLCK IX    |         |
| 1-5 B      | At1g65790  | SD-1       | 1k       |           |               |         | 2-4 E      |            |            |          | AT4g31250 | LRR III    |         |
| 1-5 B      | At1g65800  | SD-1       | 1k       |           |               |         | 2-4 E      | At2g24230  | LRR VII    |          |           |            |         |
| 1-5 B      | At1g66150  | LRR IX     |          |           |               |         | 2-4 E      | At2g24370  | RLCK IX    |          |           |            |         |
| 1-5 B      | At1g66460  | RLCK VI    |          | AT5g37790 | RLCK VI       |         | 2-4 E      | At2g25220  | N.A.       |          | AT4g32000 | N.A.       |         |
| 1-5 B      | At1g66830  | LRR VII    |          |           |               |         | 2-4 E      |            |            |          | AT4g32300 | SD-2       |         |
| 1-5 B      | At1g66880  | LRK10L-1   | 1l       | AT5g38210 | LRK10L-1      | 5c'     | 2-4 E      |            |            |          | AT4g32710 | PERKL      |         |
| 1-5 B      | At1g66910  | LRK10L-2   | 1l       | AT5g38240 | LRK10L-2      | 5c      | 2-4 E      | At2g25790  | N.A.       |          |           |            |         |
| 1-5 B      | At1g66920  | LRK10L-2   | 1l       | AT5g38250 | LRK10L-2      | 5c      | 3-4 A      | AT3g21630  | LysM       |          |           |            |         |
| 1-5 B      | At1g66930  | LRK10L-2   | 1l       | AT5g38260 | LRK10L-2      | 5c      | 3-4 A      | AT3g23750  | LRR IX     |          |           |            |         |
| 1-5 B      | At1g66980  | LRK10L-2   | 1m       |           |               |         | 3-4 A      | AT3g24240  | LRR XI     |          |           |            |         |
| 1-5 B      | At1g67000  | LRK10L-2   | 1m       | AT5g38280 | Thaumatococin | 5c'     | 3-4 A      | AT3g24400  | PERKL      |          |           |            |         |
| 2-3 A      | At2g36570  | LRR III    |          |           |               |         | 3-4 A      | AT3g24540  | PERKL      | 3a       |           |            |         |
| 2-3 A      |            |            |          | AT3g53380 | L-Lectin      |         | 3-4 A      | AT3g24550  | PERKL      | 3a       |           |            |         |
| 2-3 A      | At2g37050  | LRR I      |          | AT3g53590 | LRR VIII-1    |         | 3-4 A      | AT3g24660  | LRR VII    |          |           |            |         |
| 2-3 A      | At2g37710  | L-Lectin   |          | AT3g53810 | L-Lectin      |         | 3-4 A      | AT3g24790  | RLCKVII    |          | AT4g13190 | RLCKVII    |         |
| 2-3 A      |            |            |          | AT3g53840 | WAKL          |         | 3-5 A      | AT3g08870  | L-Lectin   |          | AT5g01540 | L-Lectin   | 5a      |
| 2-3 A      | At2g39110  | RLCKVII    |          | AT3g55450 | RLCKVII       |         | 3-5 A      |            |            |          | AT5g01550 | L-Lectin   | 5a      |
| 2-3 A      |            |            |          | AT3g55550 | L-Lectin      |         | 3-5 A      |            |            |          | AT5g01560 | L-Lectin   | 5a      |
| 2-3 A      | At2g39180  | CR4L       |          | AT3g55950 | CR4L          |         | 3-5 A      | AT3g09010  | LRR VIII-2 |          |           |            |         |
| 2-3 A      | At2g39360  | CRPK1L 1   |          |           |               |         | 3-5 A      |            |            |          | AT5g01890 | LRR VII    |         |
| 2-3 A      | At2g39660  | RLCKVII    |          |           |               |         | 3-5 A      |            |            |          | AT5g01950 | LRR VIII-1 |         |
| 2-3 A      | AT2g40270  | RLCK I     |          | AT3g56050 | RLCK I        |         | 3-5 A      |            |            |          | AT5g02070 | WAKL       |         |
| 2-3 A      | At2g41820  | LRR X      |          |           |               |         | 3-5 A      |            |            |          | AT5g02290 | RLCKVII    |         |
| 2-3 A      |            |            |          | AT3g56100 | LRR III       |         | 3-5 A      |            |            |          | AT5g02800 | RLCKVII    |         |
| 2-3 A      |            |            |          | AT3g56370 | LRR VII       |         | 3-5 A      |            |            |          | AT5g03140 | L-Lectin   |         |
| 2-3 A      |            |            |          | AT3g57710 | RLCK III      | 3f      | 3-5 A      | AT3g09780  | CR4L       |          |           |            |         |
| 2-3 A      |            |            |          | AT3g57720 | RLCK III      | 3f      | 3-5 A      | AT3g09830  | RLCKVII    |          | AT5g03320 | RLCKVII    |         |
| 2-3 A      |            |            |          | AT3g57770 | RLCK III      | 3f      | 3-5 A      |            |            |          | AT5g05160 | LRR III    |         |
| 2-3 A      | At2g41890  | SD-3       |          |           |               |         | 3-5 A      |            |            |          | AT5g06740 | L-Lectin   |         |
| 2-3 A      | At2g41970  | RLCKVIII   |          |           |               |         | 3-5 B      |            |            |          | AT5g15080 | RLCKVII    |         |
| 2-3 A      | At2g42290  | LRR VII    |          | AT3g57830 | LRR VII       |         | 3-5 B      | AT3g01840  | N.A.       |          |           |            |         |
| 2-3 A      |            |            |          | AT3g58690 | Extensin      |         | 3-5 B      | AT3g02130  | LRR X      |          |           |            |         |
| 2-3 A      | At2g42960  | RLCK V     |          | AT3g59110 | RLCK V        |         | 3-5 B      |            |            |          | AT5g15730 | LRR I      |         |
| 2-3 A      | At2g43230  | RLCKVIII   |          | AT3g59350 | RLCKVIII      |         | 3-5 B      |            |            |          | AT5g16000 | LRR II     |         |
| 2-3 A      |            |            |          | AT3g59420 | CR4L          |         | 3-5 B      | AT3g02810  | RLCKVII    |          | AT5g16500 | RLCKVII    |         |
| 2-3 A      | At2g43690  | L-Lectin   | 2h       | AT3g59700 | L-Lectin      | 3g      | 3-5 B      | AT3g02880  | LRR III    |          | AT5g16590 | LRR III    |         |
| 2-3 A      | At2g43700  | L-Lectin   | 2h       | AT3g59730 | L-Lectin      | 3g      | 3-5 B      |            |            |          | AT5g16900 | LRR I      |         |
| 2-3 A      |            |            |          | AT3g59740 | L-Lectin      | 3g      | 3-5 B      | AT3g03770  | LRR VI     |          |           |            |         |
| 2-3 A      |            |            |          | AT3g59750 | L-Lectin      | 3g      | 3-5 C      | AT3g26940  | RLCKVII    |          |           |            |         |
| 2-3 A      | At2g45340  | LRR IV     |          |           |               |         | 3-5 C      | AT3g28040  | LRR VII    |          |           |            |         |
| 2-3 A      | At2g45590  | N.A.       |          |           |               |         | 3-5 C      |            |            |          | AT5g40380 | DUF26      |         |
| 2-3 A      | At2g45910  | RLCK IX    |          |           |               |         | 3-5 D      | AT3g45390  | L-Lectin   | 3b       | AT5g60300 | L-Lectin   | 5i      |
| 2-3 A      | At2g46850  | N.A.       |          |           |               |         | 3-5 D      | AT3g45410  | L-Lectin   | 3b       | AT5g60280 | L-Lectin   | 5i      |
| 2-3 A      | At2g47060  | RLCKVIII   |          | AT3g62220 | RLCKVIII      |         | 3-5 D      | AT3g45420  | L-Lectin   | 3b       | AT5g60270 | L-Lectin   | 5i      |
| 2-4 A      | At2g16750  | RLCK VI    |          | AT4g35030 | RLCK VI       |         | 3-5 D      | AT3g45430  | L-Lectin   | 3b       |           |            |         |
| 2-4 A      | At2g17090  | RLCK II    |          | AT4g35230 | RLCK II       |         | 3-5 D      | AT3g45440  | L-Lectin   | 3b       |           |            |         |
| 2-4 A      | At2g17220  | RLCKVII    |          | AT4g35600 | RLCKVII       |         | 3-5 D      |            |            |          | AT5g60090 |            | 5h      |
| 2-4 A      | At2g18470  | PERKL      |          |           |               |         | 3-5 D      |            |            |          | AT5g60080 |            | 5h      |
| 2-4 A      |            |            |          | AT4g36180 | LRR VII       |         | 3-5 D      | AT3g45860  | DUF26      |          |           |            |         |
| 2-4 B      | At2g18890  | RLCK VI    |          |           |               |         | 3-5 D      | AT3g46290  | CRPK1L 1   | 3c?      | AT5g59700 | CRPK1L 1   | 5g'     |
| 2-4 B      | At2g19130  | SD-2       |          |           |               |         | 3-5 D      | AT3g46330  | LRR I      | 3c       | AT5g59680 | LRR I      | 5g      |
| 2-4 B      | At2g19190  | LRR I      | 2b       | AT4g29990 | LRR I         |         | 3-5 D      | AT3g46340  | LRR I      | 3c       | AT5g59670 | LRR I      | 5g      |
| 2-4 B      | At2g19210  | LRR I      | 2b       | AT4g29450 | LRR I         |         | 3-5 D      | AT3g46350  | LRR I      | 3c       | AT5g59660 | LRR I      | 5g      |
| 2-4 B      | At2g19230  | LRR I      | 2b       | AT4g29180 | LRR I         |         | 3-5 D      | AT3g46370  | LRR I      | 3c       | AT5g59650 | LRR I      | 5g      |

**Supplement D. Correspondence between duplicated regions (Contd.)**

| Chr   | A          |            |            | B         |           |           |
|-------|------------|------------|------------|-----------|-----------|-----------|
|       | REgion ID1 | Gene Name2 | Subfamily3 | Cluster4  | Gene Name | Subfamily |
| 3-5 D | AT3g46400  | LRR I      | 3c         |           |           |           |
| 3-5 D | AT3g46410  | LRR I      | 3c         |           |           |           |
| 3-5 D | AT3g46420  | LRR I      | 3c         |           |           |           |
| 3-5 D | AT3g46760  | L-Lectin   |            | AT5g59270 | L-Lectin  | 5f        |
| 3-5 D |            |            |            | AT5g59260 | L-Lectin  | 5f        |
| 3-5 D |            |            |            | AT5g59010 | RLCK II   |           |
| 3-5 D | AT3g47090  | LRR XII    | 3d         |           |           |           |
| 3-5 D | AT3g47110  | LRR XII    | 3d         |           |           |           |
| 3-5 D |            |            |            | AT5g58940 | RLCK IV   |           |
| 3-5 E | AT3g47570  | LRR XII    | 3e         |           |           |           |
| 3-5 E | AT3g47580  | LRR XII    | 3e         |           |           |           |
| 3-5 E |            |            |            | AT5g62710 | LRR X     |           |
| 3-5 E |            |            |            | AT5g63410 | LRR VI    |           |
| 3-5 F |            |            |            | AT5g66790 | WAKL      |           |
| 3-5 F | AT3g50230  | LRR III    |            | AT5g67200 | LRR III   |           |
| 3-5 F |            |            |            | AT5g67280 | LRR VII   |           |
| 4-4 A |            |            |            | AT4g23740 | LRR III   |           |
| 4-4 A | AT4g11460  | DUF26      | 4d         | AT4g23320 | DUF26     | 4g        |
| 4-4 A | AT4g11470  | DUF26      | 4d         | AT4g23310 | DUF26     | 4g        |
| 4-4 A | AT4g11480  | DUF26      | 4d         | AT4g23300 | DUF26     | 4g        |
| 4-4 A | AT4g11490  | DUF26      | 4d         | AT4g23290 | DUF26     | 4g        |
| 4-4 A | AT4g11500  | DUF26      | 4d         | AT4g23280 | DUF26     | 4g        |
| 4-4 A | AT4g11530  | DUF26      | 4d         | AT4g23270 | DUF26     | 4g        |
| 4-4 A |            |            |            | AT4g23260 | DUF26     | 4g        |
| 4-4 A |            |            |            | AT4g23250 | DUF26     | 4g        |
| 4-4 A |            |            |            | AT4g23240 | DUF26     | 4g        |
| 4-4 A |            |            |            | AT4g23230 | DUF26     | 4g        |
| 4-4 A |            |            |            | AT4g23220 | DUF26     | 4g        |
| 4-4 A |            |            |            | AT4g23210 | DUF26     | 4g        |
| 4-4 A |            |            |            | AT4g23200 | DUF26     | 4g        |
| 4-4 A |            |            |            | AT4g23190 | DUF26     | 4g        |
| 4-4 A |            |            |            | AT4g23180 | DUF26     | 4g        |
| 4-4 A |            |            |            | AT4g23160 | DUF26     | 4g        |
| 4-4 A |            |            |            | AT4g23150 | DUF26     | 4g        |
| 4-4 A |            |            |            | AT4g23140 | DUF26     | 4g        |
| 4-4 A |            |            |            | AT4g23130 | DUF26     | 4g        |
| 4-4 A | AT4g11890  | DUF26      |            | AT4g22730 | LRR IV    |           |
| 4-4 A | AT4g11900  | SD-1       |            |           |           |           |
| 4-5 A | AT4g17660  | RLCKVII    |            | AT5g47070 | RLCKVII   |           |
| 4-5 A | AT4g18250  | Thaumatin  |            |           |           |           |
| 4-5 A |            |            |            | AT5g46330 | LRR XII   |           |
| 4-5 A |            |            |            | AT5g46080 |           |           |
| 4-5 A | AT4g18640  | LRR VI     |            | AT5g45840 | LRR VI    |           |
| 4-5 A |            |            |            | AT5g45800 | LRR VII   |           |
| 4-5 A |            |            |            | AT5g45780 | LRR II    |           |
| 4-5 A | AT4g20140  | LRR XI     |            | AT5g44700 | LRR XI    |           |
| 4-5 A | AT4g20270  | LRR XI     |            |           |           |           |
| 4-5 A | AT4g20450  | LRR I      |            |           |           |           |
| 4-5 A | AT4g20790  | LRR VI     |            |           |           |           |
| 4-5 B | AT4g25160  | RLCK IX    |            | AT5g51270 | RLCK IX   |           |
| 4-5 B |            |            |            | AT5g51350 | LRR IV    |           |
| 4-5 B |            |            |            | AT5g51560 | LRR IV    |           |
| 4-5 B | AT4g25390  | N.A.       |            | AT5g51770 | N.A.      |           |
| 4-5 C |            |            |            | AT5g56890 | Extensin  |           |
| 4-5 C |            |            |            | AT5g56790 | PERKL     |           |
| 4-5 C |            |            |            | AT5g56460 | RLCKVII   |           |
| 4-5 C | AT4g26540  | LRR XI     |            | AT5g56040 | LRR XI    |           |
| 4-5 C |            |            |            | AT5g55830 | L-Lectin  |           |
| 4-5 C |            |            |            | AT5g54590 | LRR I     |           |
| 4-5 C |            |            |            | AT5g54380 | CRPK1 L 1 |           |
| 4-5 C |            |            |            | AT5g53890 | LRR X     |           |
| 4-5 C | AT4g27290  | SD-1       | 4h         |           |           |           |
| 4-5 C | AT4g27300  | SD-1       | 4h         |           |           |           |
| 5-5 A | AT5g10020  | LRR VII    |            |           |           |           |
| 5-5 A | AT5g10290  | LRR II     |            | AT5g65240 | LRR II    |           |
| 5-5 A |            |            |            | AT5g65500 | RLCK IX   |           |
| 5-5 A | AT5g10520  | RLCK VI    |            | AT5g65530 | RLCK VI   |           |
| 5-5 A | AT5g10530  | L-Lectin   |            | AT5g65600 | L-Lectin  |           |

1. The matching regions between two chromosomes (e.g. 1-3, chr 1 and 3).
2. The matdb designation (see supplementary table A for accessions).
3. Classification As shown in supplementary table A.
4. Tandem repeats of rlks defined with the criteria discussed in the text. The number refers to the chromosome number, and the letter refers to the numbering of clusters.
